# Supplementary material for: lncRNA profile study reveals the mRNAs and lncRNAs associated with docetaxel resistance in breast cancer cells
Source: PubMed Central journal article supplement (PMC6299474; doi:10.1038/s41598-018-36231-4), 2018-12-19

Sup Fig.4

A.

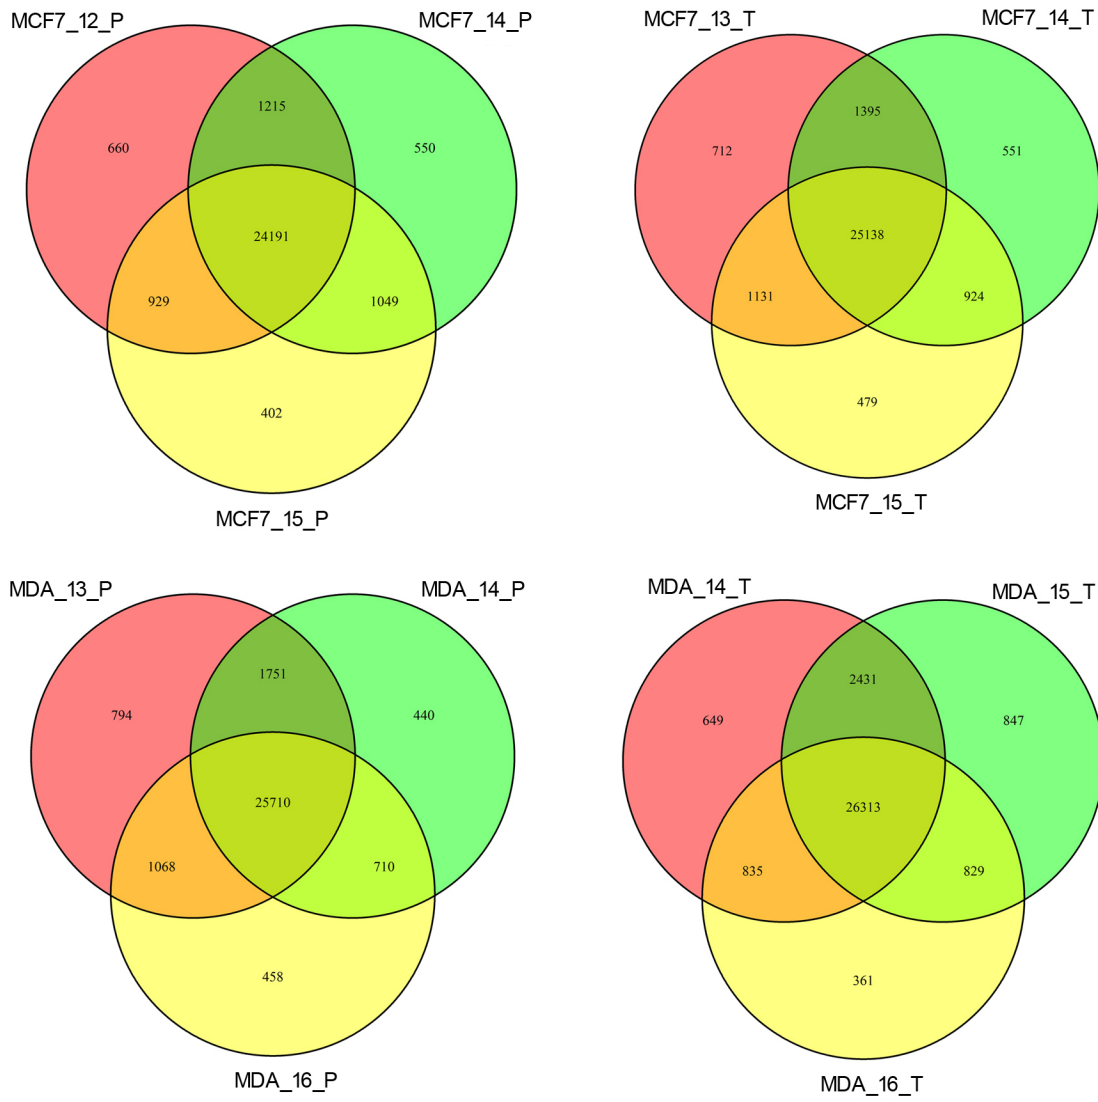

B.

**lncRNA PCA**

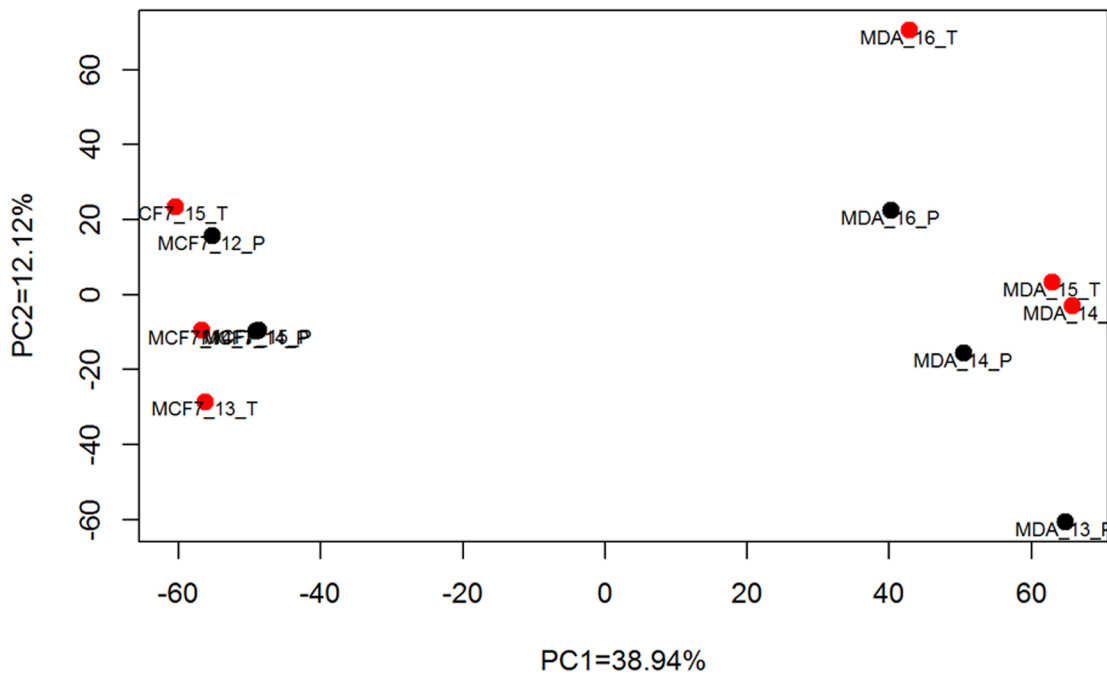

Supplement: 41598_2018_36231_MOESM5_ESM.pdf [file 41598_2018_36231_MOESM5_ESM.pdf]
